# Supplementary material for: British Society of Gastroenterology interim framework for addressing the COVID-19-related backlog in inflammatory bowel disease colorectal cancer surveillance
Source: PubMed Central journal article supplement — Gut. 2022 Sep 5;72(9):1631–4. doi: 10.1136/gutjnl-2022-328309 (PMC10423467; doi:10.1136/gutjnl-2022-328309), 2022-09-05
Supplement: gutjnl-2022-328309supp001.pdf [file gutjnl-2022-328309supp001.pdf]

## Appendix 1.

## Crohn's and colitis UK: Follow up questionnaire responses from the IBD Surveillance Colonoscopies focus group

|              | I think it is reasonable and fair to arrange procedures for patients most at risk of bowel cancer with IBD first. | I would support the short-term proposal to use stool tests to prioritise patients waiting for surveillance procedures to manage the current backlog | I think it is reasonable to postpone or stop surveillance procedures in some patients who are deemed to be very low risk of IBD related bowel cancer | I would support research to identify non-invasive (for example stool or blood) biomarkers to predict future bowel cancer risk in patients with IBD |
|--------------|-------------------------------------------------------------------------------------------------------------------|-----------------------------------------------------------------------------------------------------------------------------------------------------|------------------------------------------------------------------------------------------------------------------------------------------------------|----------------------------------------------------------------------------------------------------------------------------------------------------|
| Respondent 1 | Strongly Agree                                                                                                    | Agree                                                                                                                                               | Agree                                                                                                                                                | Strongly Agree                                                                                                                                     |
| Respondent 2 | Strongly Agree                                                                                                    | Agree                                                                                                                                               | Agree                                                                                                                                                | Strongly Agree                                                                                                                                     |
| Respondent 3 | Strongly Agree                                                                                                    | Strongly Agree                                                                                                                                      | Strongly Disagree                                                                                                                                    | Agree                                                                                                                                              |
| Respondent 4 | Agree                                                                                                             | Strongly Agree                                                                                                                                      | Agree                                                                                                                                                | Strongly Agree                                                                                                                                     |
| Respondent 5 | Strongly Agree                                                                                                    | Strongly Agree                                                                                                                                      | Agree                                                                                                                                                | Strongly Agree                                                                                                                                     |
| Respondent 6 | Strongly Agree                                                                                                    | Agree                                                                                                                                               | Neutral                                                                                                                                              | Agree                                                                                                                                              |
| Respondent 7 | Strongly Agree                                                                                                    | Strongly Agree                                                                                                                                      | Strongly Agree                                                                                                                                       | Strongly Agree                                                                                                                                     |

|                                 | <b>Author</b>       |
|---------------------------------|---------------------|
| Scottish IBD Surveillance Group | Antonia Churchhouse |
|                                 | Victoria Moffat     |
|                                 | Ian Penman          |
|                                 | Shahida Din         |
|                                 | Michelle Thornton   |
|                                 | Cathy Dunn          |
|                                 | Malcolm Smith       |
|                                 | Gillian Bain        |
|                                 | Mairi McLean        |
|                                 | Craig Mowat         |
|                                 | Michael Miller      |
|                                 | Hasnain Jafferbhoy  |
|                                 | Colin Noble         |
|                                 | Nick Church         |
|                                 | Ian Arnott          |
|                                 | Gareth-Rhys Jones   |
|                                 | Jonathan Fletcher   |
|                                 | Zahra Bayaty        |
|                                 | Elaine Robertson    |
|                                 | Selina Lamont       |
|                                 | Ali Taha            |
|                                 | Graham Naismith     |
|                                 | John Paul Seenan    |
| Dan Gaya                        |                     |
| Jack Winter                     |                     |
| Santosh Salunke                 |                     |
| James Duncan                    |                     |
| Richard Russell                 |                     |
| Mark Arends                     |                     |
| Kathryn Kirkwood                |                     |
| BSG Committee Representation    | Antonia Churchhouse |
|                                 | Ian Penman          |
|                                 | Shahida Din         |
|                                 | Christian Selinger  |
|                                 | Chris Lamb          |
|                                 | Rachel Cooney       |
|                                 | Noor Mohammed       |
|                                 | Gordon Moran        |
|                                 | Morris Gordon       |
|                                 | Ailsa Hart          |
| Ibrahim Al-Bakir                |                     |
| Ruth Wakeman                    |                     |
| Melissa Ganendran               |                     |

|  |               |
|--|---------------|
|  | Rachel Ainley |
|--|---------------|
